# Supplementary material for: Oncostatin M-driven macrophage-fibroblast circuits as a drug target in autoimmune arthritis
Source: PubMed Central journal article supplement (PMC11289929; doi:10.1186/s41232-024-00347-0), 2024-07-31
Supplement: 41232_2024_347_MOESM1_ESM.pdf [file 41232_2024_347_MOESM1_ESM.pdf]

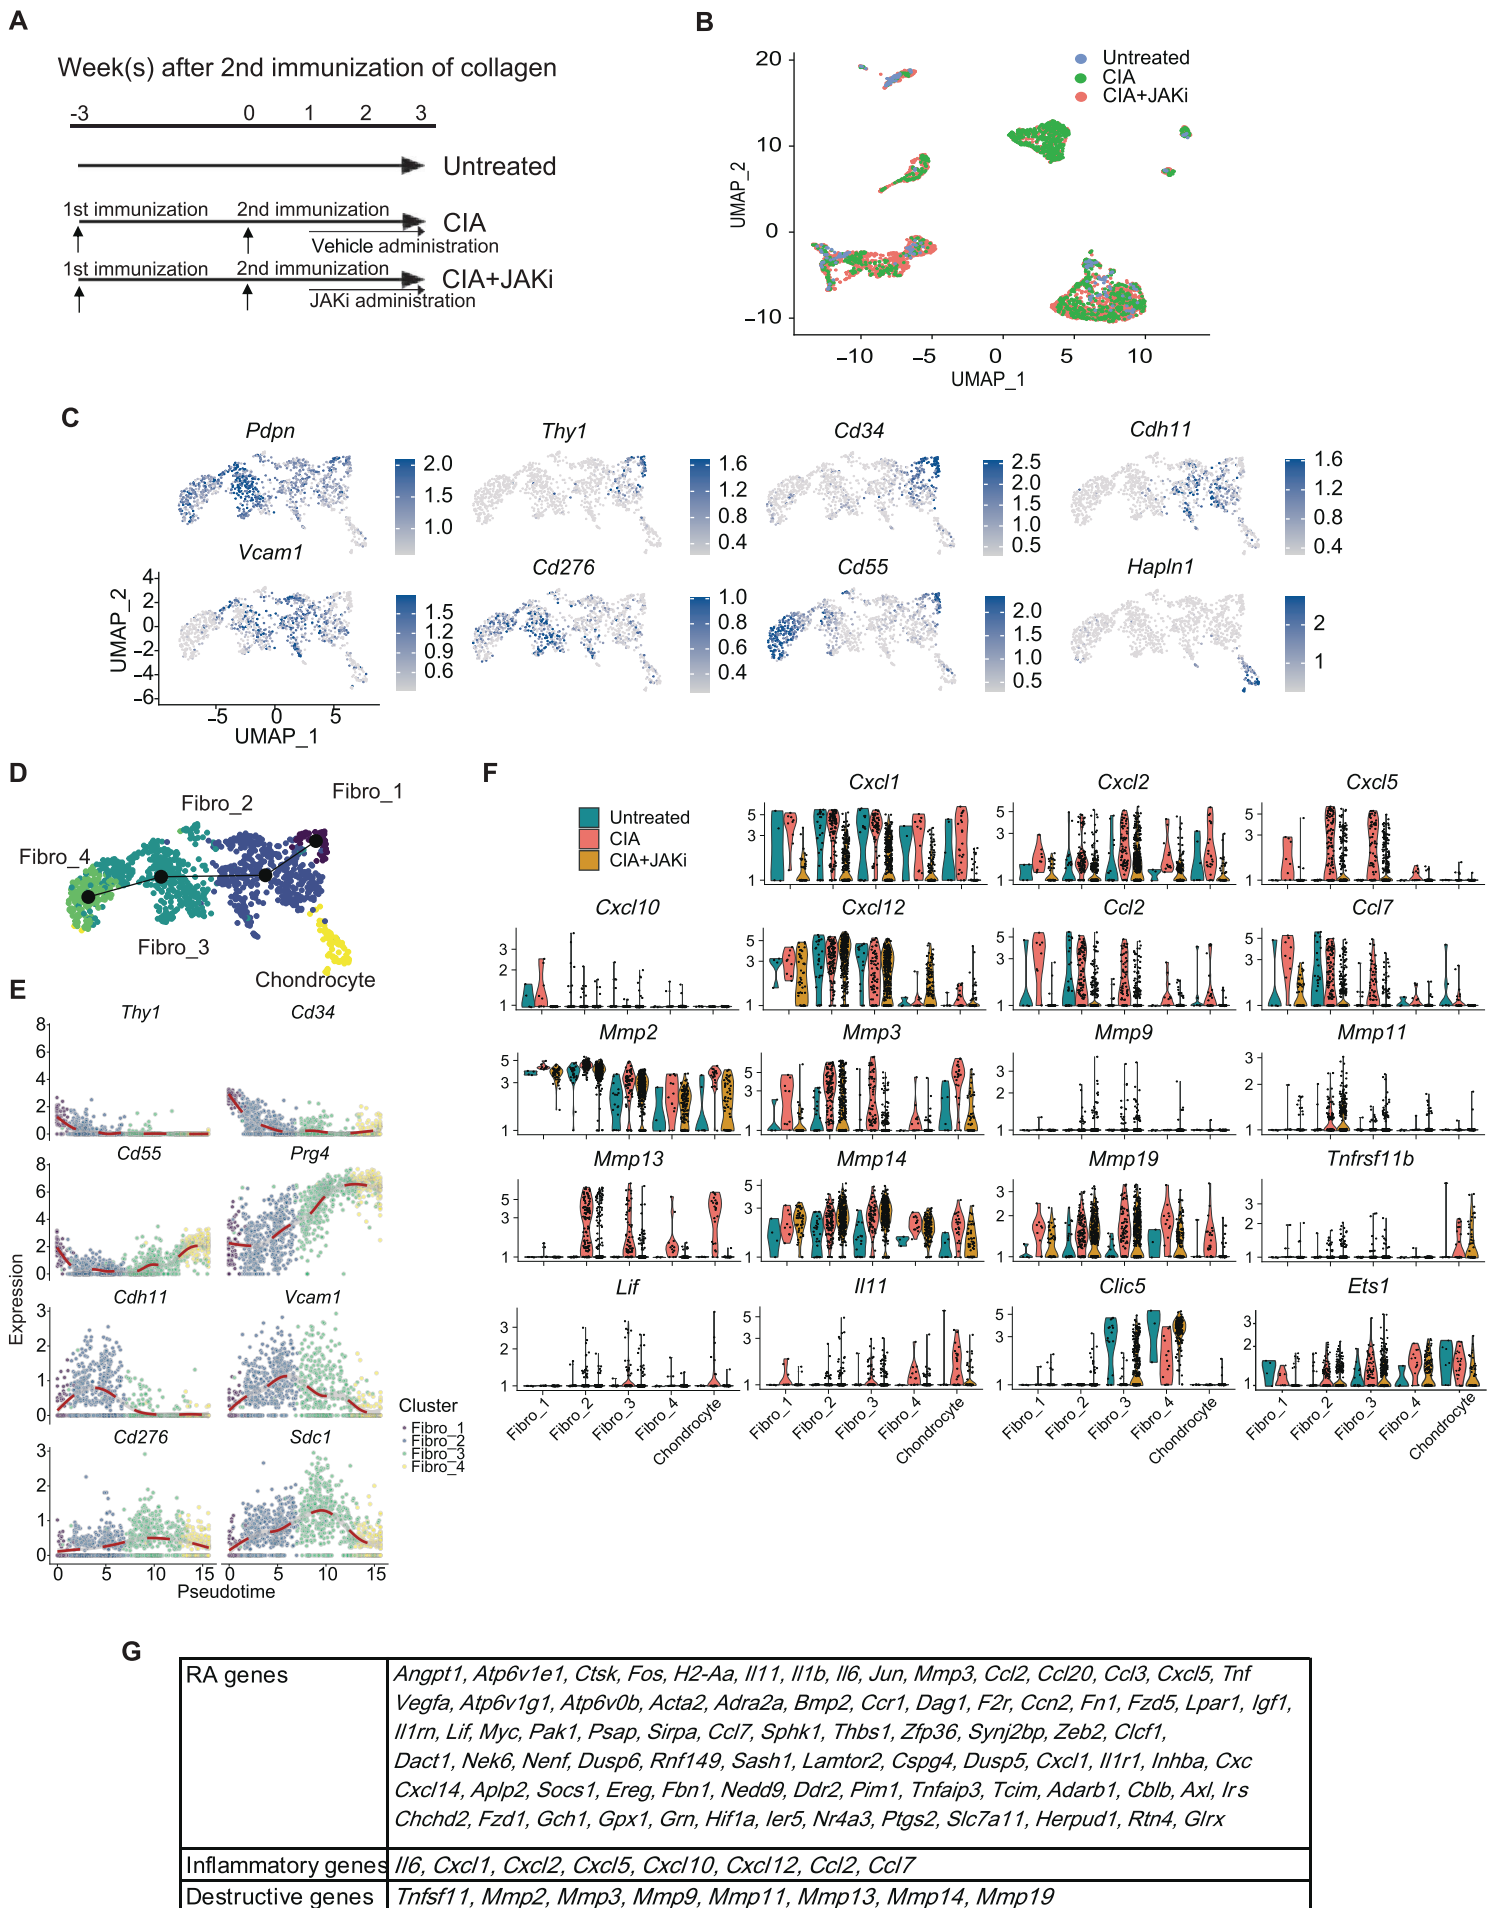

**Fig. S1. Characterization of mouse CIA synovial cells by scRNA-seq analysis.**

(A) Experimental procedure to obtain the synovial tissues under the untreated, CIA and CIA+JAKi conditions for scRNA seq analysis. (B) Distribution of synovial cells under the untreated, CIA, and CIA+JAKi conditions. (C) Feature plots of the main markers of mouse synovial fibroblast sub-clusters. (D) Trajectory analysis of synovial fibroblast from fibro\_1 via fibro\_2, 3 to fibro\_4. (E) Expression of the main markers during the trajectory in synovial fibroblasts. (F) Violin plots of inflammatory, destructive and RA-related genes in synovial fibroblast clusters under the untreated, CIA, and CIA+JAKi conditions. (G) List of RA, inflammatory and destructive genes.

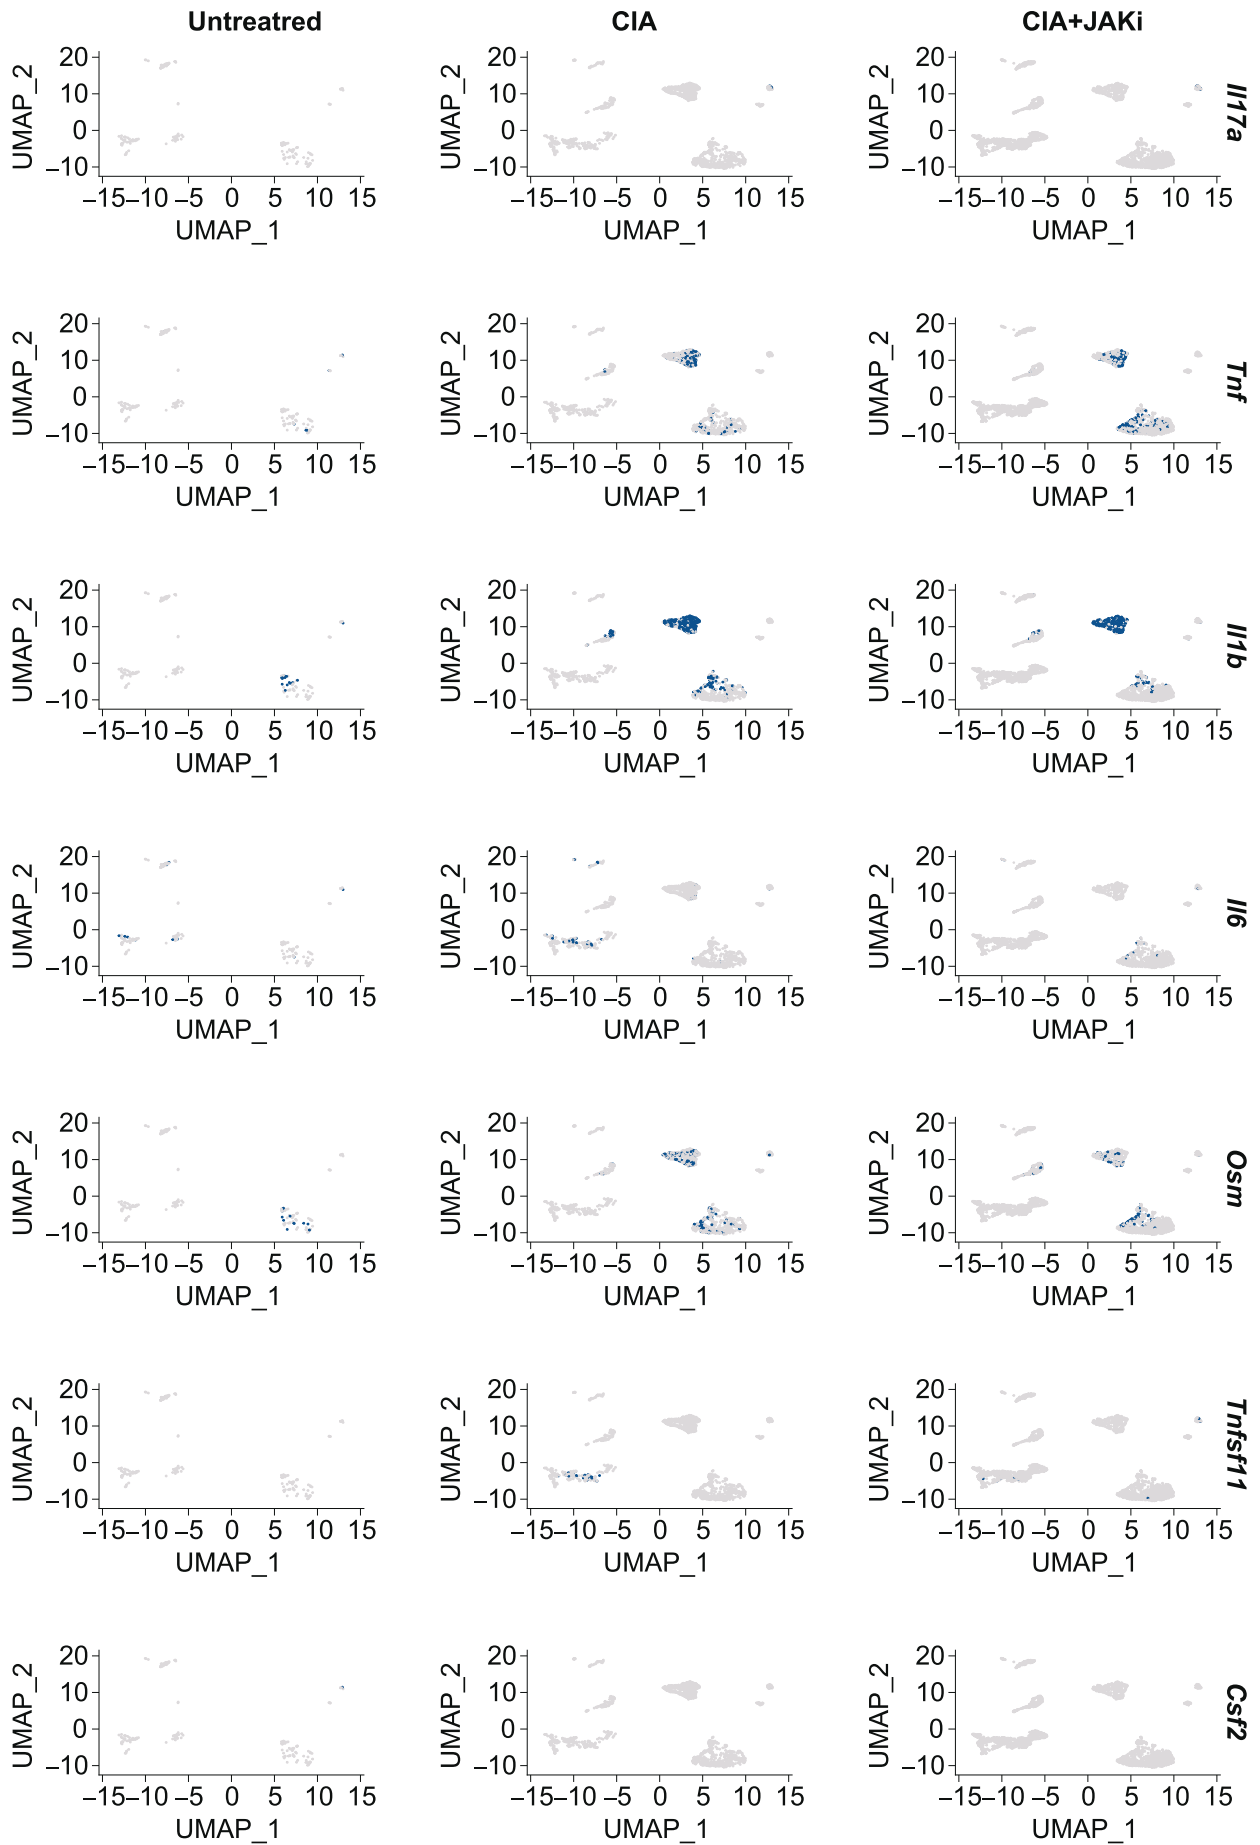

**Fig. S2. Expression of the representative inflammatory and destructive genes in mouse synovial cells**  
 Feature plot of the expression of *Tnf*, *Il1b*, *Il6*, *Osm*, *Tnfsf11* and *Csf2* in mouse synovial cells under the untreated (left), CIA (middle) and CIA+JAKi (right) conditions are shown.



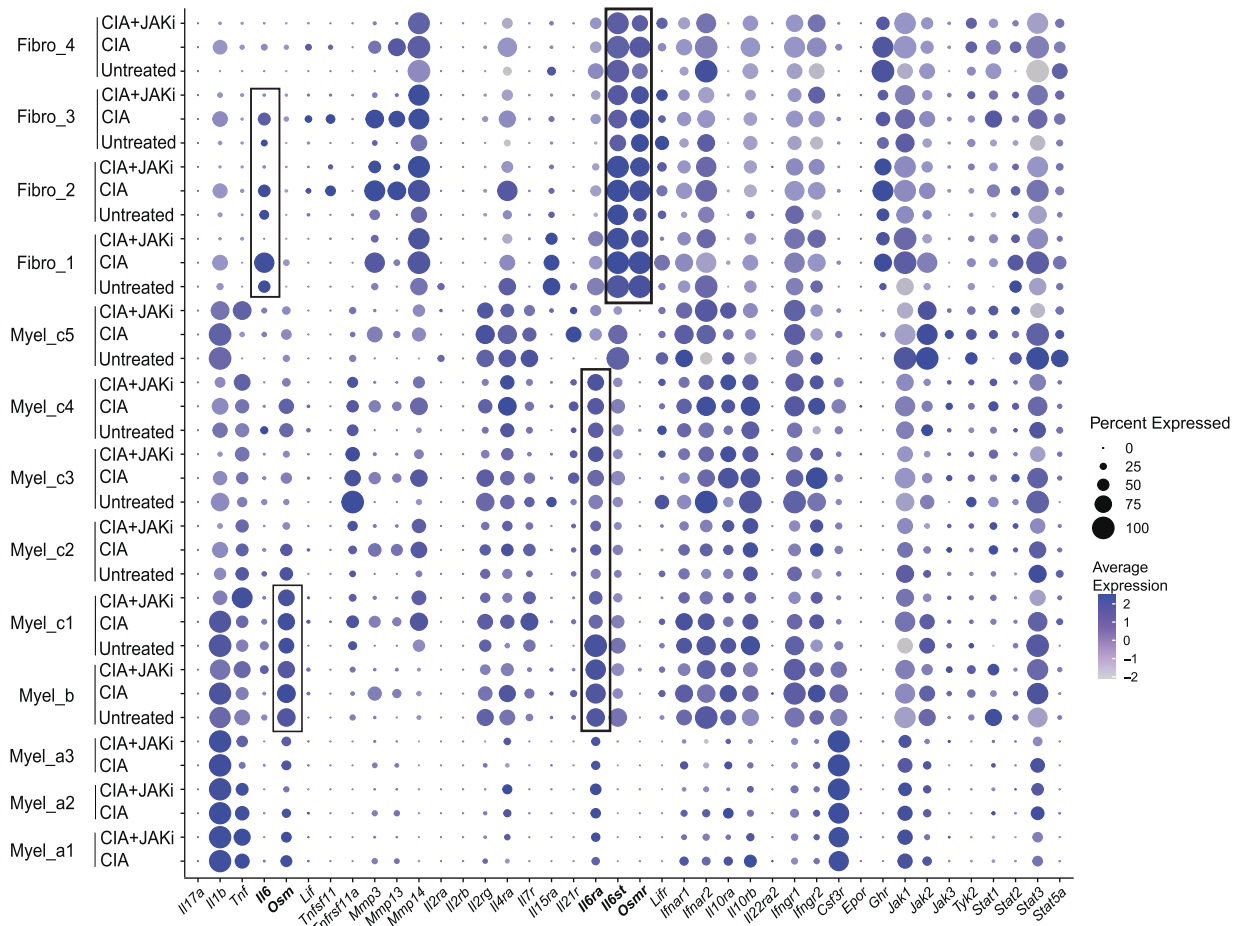

**Fig. S3. Dot plot of average gene expression in CIA synovial cells.**

Average expression of JAK/STAT cytokines and receptors as well as the representative inflammatory and destructive genes in myeloid and synovial fibroblast sub-clusters under untreated, CIA, and CIA+JAKi conditions.

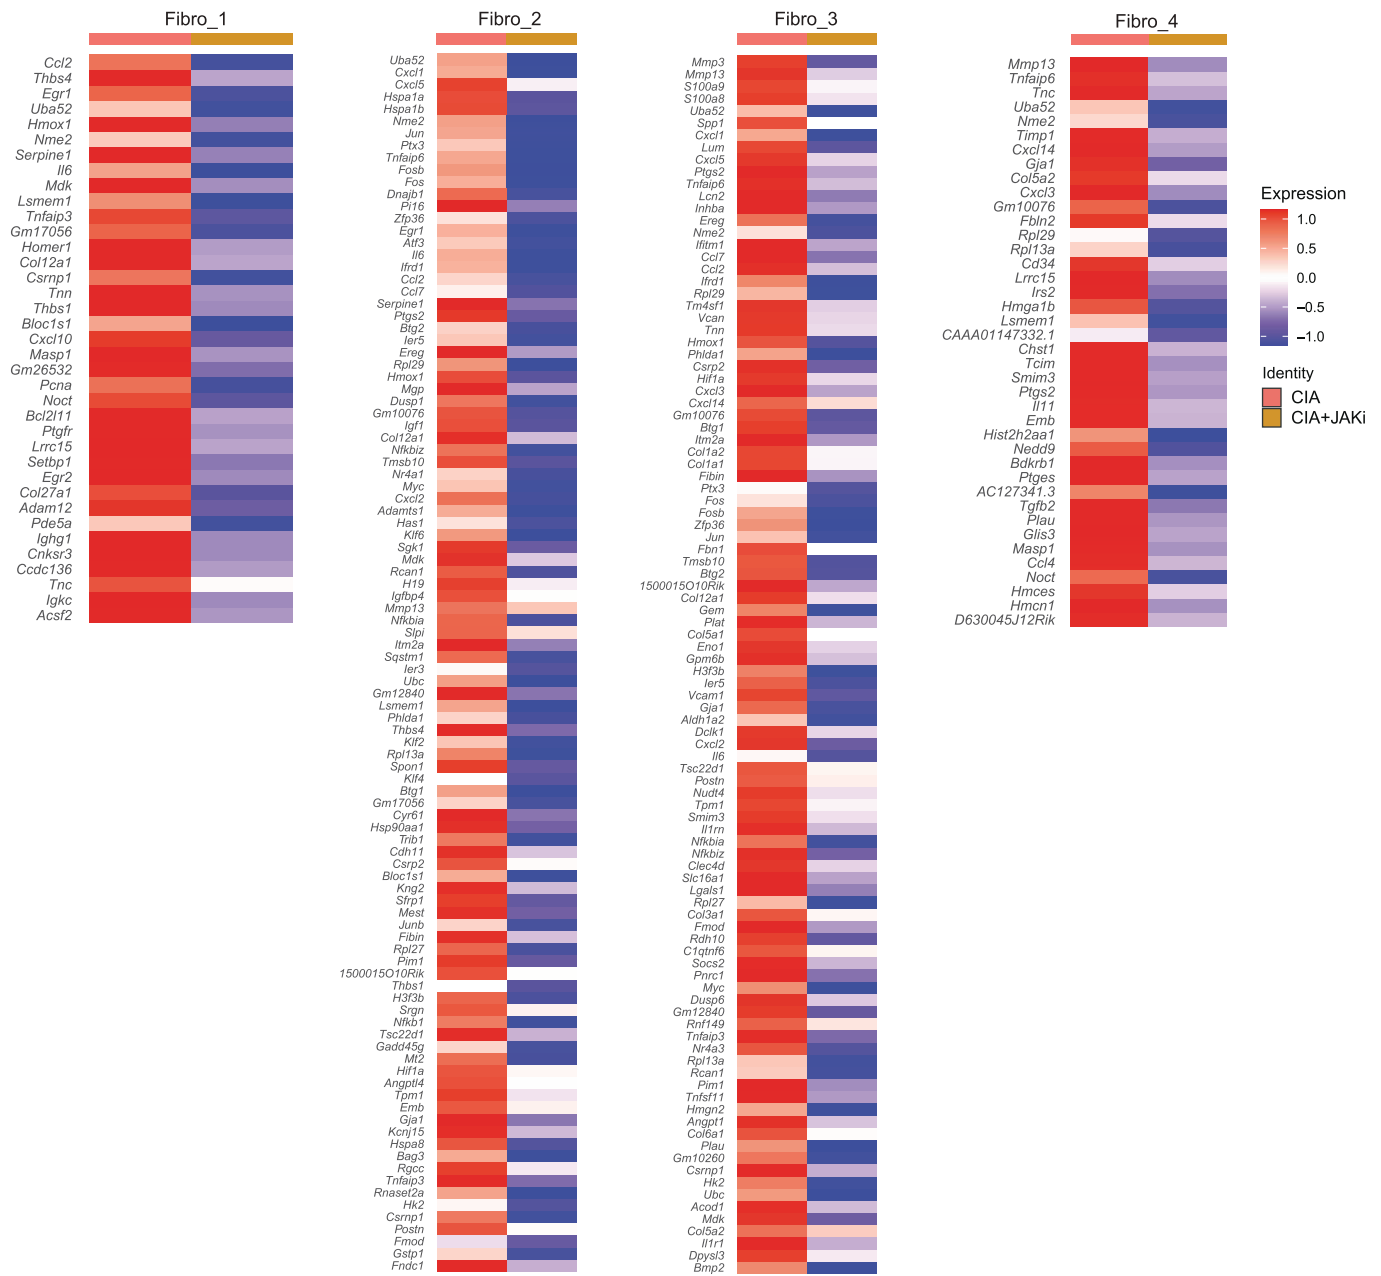

**Fig. S4. Differentially expressed genes upregulated under CIA and downregulated under CIA+JAKi conditions in synovial fibroblast subpopulations**

Differentially expressed genes (ranked by log2 fold change) upregulated under CIA (vs untreated) conditions and downregulated under CIA+JAKi (vs CIA) in synovial fibroblast subsets are shown.

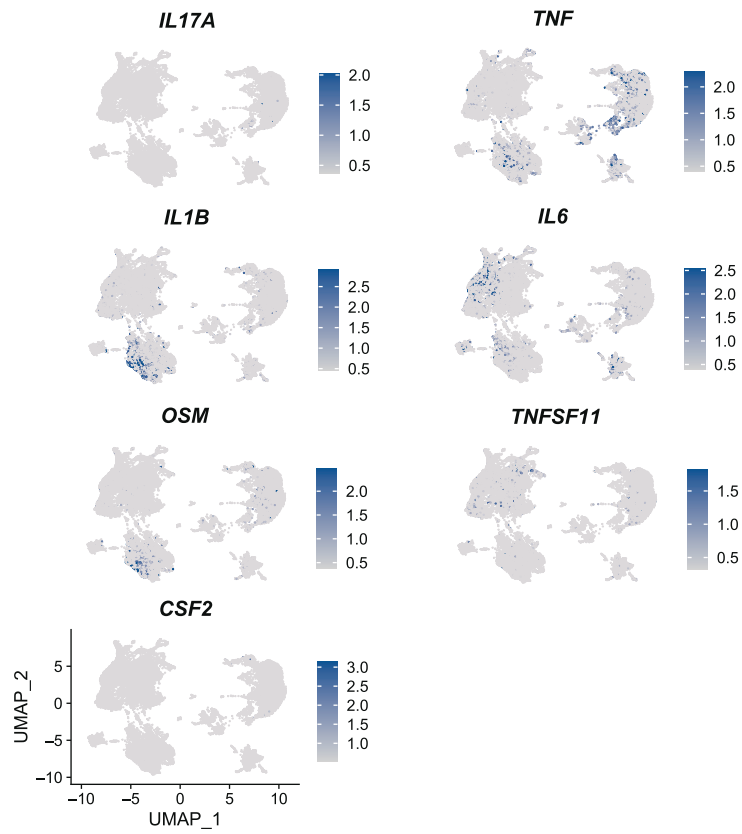

**Fig. S5. Featureplots of expression of inflammatory and destructive genes in RA synovial cells.** Previously reported scRNA-seq data sets on RA synovial tissues (ref21,41) were integrated and used for analysis.

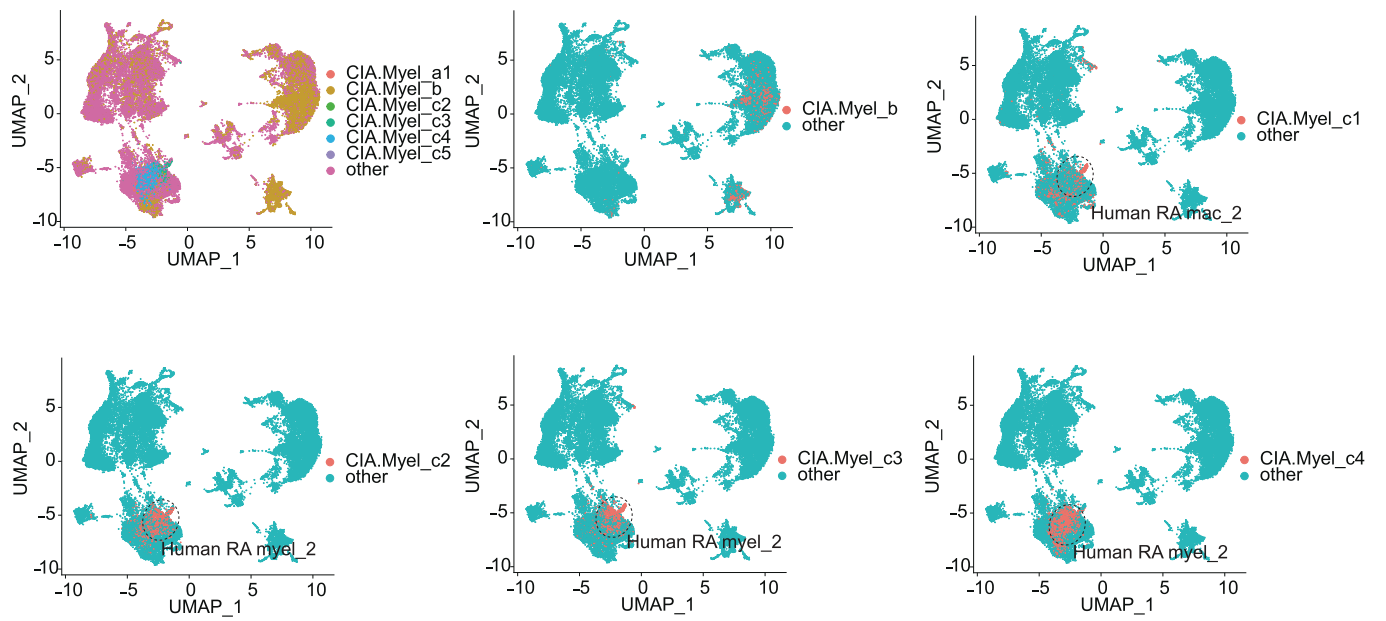

**Fig. S6. Resemblance between CIA mouse myel\_ c1-4 cells and RA myel\_2.**  
 Module scores of mouse CIA myeloid markers in human RA synovial cells were calculated by AddModuleScore.

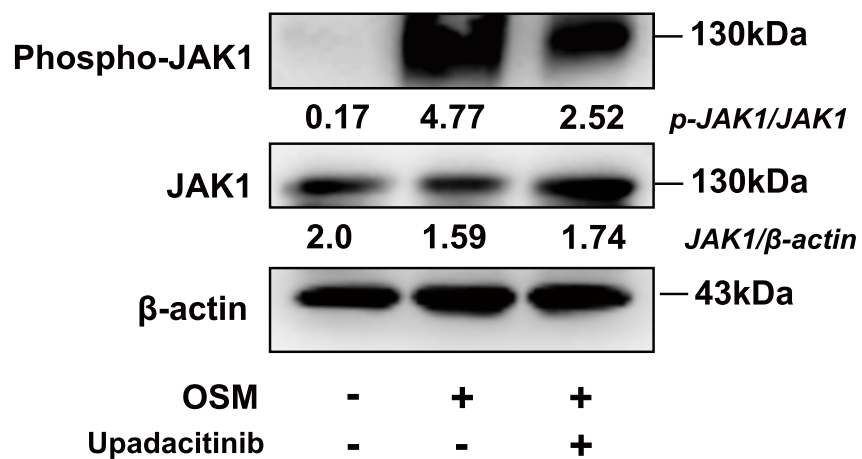

**Fig. S7. Upadacitinib suppresses OSM-induced JAK1 phosphorylation in CIA synovial fibroblasts**  
 Immunoblot analysis of CIA synovial fibroblasts pretreated with upadacitinib for 2hr followed by stimulation with OSM for 20 min. The representative data of three independent experiments is shown.



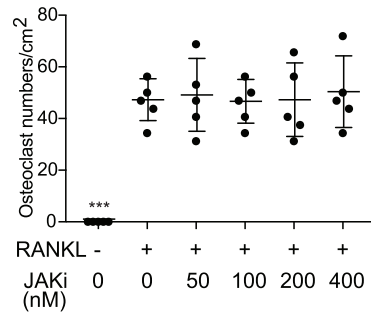

**Fig. S8. No effect of the JAK inhibitor on osteoclast precursor cells in osteoclastogenesis.** All data are expressed as the mean  $\pm$  SD. \*\*\* $p < 0.001$  by one-way ANOVA with the Holm-Sidak test vs. all other groups.

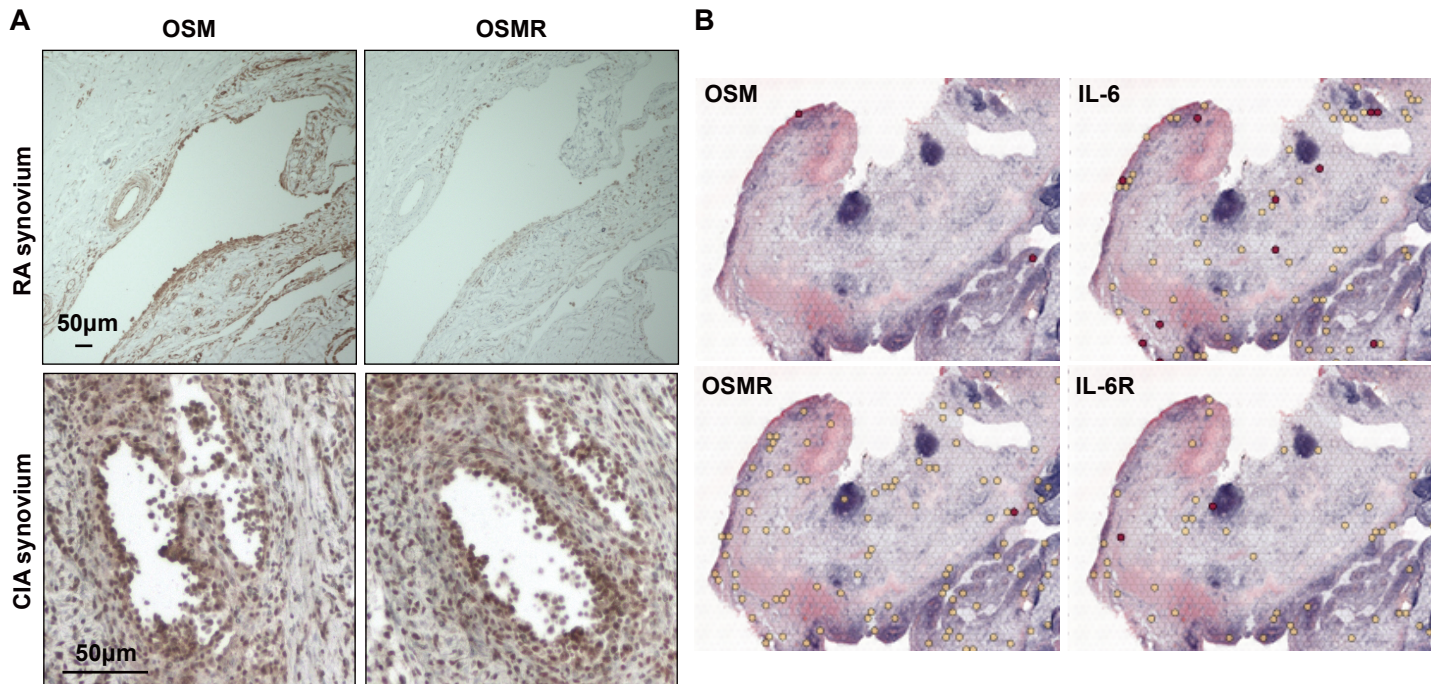

**Fig. S9. Statal expression of OSM, OSMR, IL-6 and IL-6R in the arthritic synovium**

(A) Immunohistochemistry of RA (upper) and CIA (lower) synovium. Expression of OSM and OSMR in RA (upper) and CIA (lower) synovium. The representative data. Scale bar 50µm.

(B) Spatial transcriptomics (<https://www.immport.org/shared/study/SDY2213>) of RA synovium. Expression of OSM, IL-6, OSMR, and IL-6R on the spatial transcriptomics slide is shown.
